# Supplementary material
Source: PubMed Central journal article supplement (PMC3378655)
Supplement: NIHMS47476-supplement-1.pdf [file NIHMS47476-supplement-1.pdf]

|                                |                                                                                                    |     |
|--------------------------------|----------------------------------------------------------------------------------------------------|-----|
| Majority                       | MKEI YYI VI LCSLYLI NLGNCS EGT DNI I S ENGDVVKF DLI PKENT ERS HKLI NPWEKFMKEYDI EKVHGS GI RVDLGEDA |     |
|                                | 10 20 30 40 50 60 70 80                                                                            |     |
| <i>P. chabaudi chabaudi</i> AS | MKEI YYI VI LCSLYLI NLGNCS EGT DNI I S ENGDVVKF DLI PKENT ERS HKLI NPWEKFMKEYDI EKVHGS GI RVDLGEDA | 80  |
| <i>P. chabaudi adami</i> DS    | MKEI YYI VI LCSLYLI NLGNCS EGT DNI I S ENGDVVKF DLI PKENT ERS HKLI NPWEKFMKEYDI EKVHGS GI RVDLGEDA | 80  |
| Majority                       | RVENQDYRI PSGKCPVMGKGI TI QX SXX SFLXXVATGX QKVREGGLAF PXXDVNI SPXXI XNLXXMYKXHXEI XALNDMS         |     |
|                                | 90 100 110 120 130 140 150 160                                                                     |     |
| <i>P. chabaudi chabaudi</i> AS | RVENQDYRI PSGKCPVMGKGI TI QSSKVSFLVATGQKVREGGLAF PXXDVNI SPXXI XNLXXMYKXHXEI XALNDMS               | 160 |
| <i>P. chabaudi adami</i> DS    | RVENQDYRI PSGKCPVMGKGI TI QKSTKSF LDPVATGQKVREGGLAF PKADVNI SPVLI QNLREMYKEHPEI IALNDMS            | 160 |
| Majority                       | LCAKHASFXVPGXNXNAYRHPAVYDKNXTCYI LYVAAQENMGPRYCSNEEXNENQPF CFTPEKKDEYKNLSYLTKNLR                   |     |
|                                | 170 180 190 200 210 220 230 240                                                                    |     |
| <i>P. chabaudi chabaudi</i> AS | LCAKHASFXVPGXNAYRHPAVYDKNXTCYI LYVAAQENMGPRYCSNEEXNENQPF CFTPEKKDEYKNLSYLTKNLR                     | 240 |
| <i>P. chabaudi adami</i> DS    | LCAKHASFXVPGNNANAYRHPAVYDKHNKTCYI LYVAAQENMGPRYCSNEENNENQPF CFTPEKKDEYKNLSYLTKNLR                  | 240 |
| Majority                       | EDWET SCPNKS I QNAKF GVMMDGYCSEYQKKEVDSXSL SXCXI VFDESASDQP KQYEKHL EDTXKRRGI VDRNGKLI             |     |
|                                | 250 260 270 280 290 300 310 320                                                                    |     |
| <i>P. chabaudi chabaudi</i> AS | EDWET SCPNKS I QNAKF GVMMDGYCSEYQKKEVDSXSL SXCXI VFDESASDQP KQYEKHL EDTXKRRGI VDRNGKLI             | 320 |
| <i>P. chabaudi adami</i> DS    | EDWET SCPNKS I QNAKF GVMMDGYCSEYQKKEVHDSKSL SECNRI VFDESASDQP KQYEKHL EDTTKFRRGI VDRNGKLI          | 320 |
| Majority                       | GEALLPI GSYRADQVKS KGKGYNWMANYDKKEKKCYI FNKKPT CLI NDKNFVATT ALS SLEEAQESFP CDI YKKKI AEEI         |     |
|                                | 330 340 350 360 370 380 390 400                                                                    |     |
| <i>P. chabaudi chabaudi</i> AS | GEALLPI GSYRADQVKS KGKGYNWMANYDKKEKKCYI FNKKPT CLI NDKNFVATT ALS SLEEAQESFP CDI YKKKI AEEI         | 400 |
| <i>P. chabaudi adami</i> DS    | GEALLPI GSYRADQVKS KGKGYNWMANYDKKEKKCYI FNKKPT CLI NDKNFVATT ALS SLEEAPQESFP CDI YKKKI AEEI        | 400 |
| Majority                       | KVMNVNRNNGNX TI XFPRI FISDDKESL KCPCEPTQLT QSSCNFVFCNCVEKRFI SENNEVEI KXEFKSEYESPI NQR             |     |
|                                | 410 420 430 440 450 460 470 480                                                                    |     |
| <i>P. chabaudi chabaudi</i> AS | KVMNVNRNNGNXTI XFPRI FISDDKESL KCPCEPTQLT QSSCNFVFCNCVEKRFI SENNEVEI KXEFKSEYESPI NQR              | 480 |
| <i>P. chabaudi adami</i> DS    | KVMNVNRNNGNDTI XFPRI FISDDKESL KCPCEPTQLT QSSCNFVFCNCVEKRFI SENNEVEI KDEFKSEYESPI NQR              | 480 |
| Majority                       | MLIIII LI ATGAI LASLLI FYFFKSNKP GDDYDKMGQADT YGKAQSRKDEMLDPEVSWGEGDKRASHTT PVLMEKPY               |     |
|                                | 490 500 510 520 530 540 550                                                                        |     |
| <i>P. chabaudi chabaudi</i> AS | MLIIII LI ATGAI LASLLI FYFFKSNKP GDDYDKMGQADT YGKAQSRKDEMLDPEVSWGEGDKRASHTT PVLMEKPY               | 558 |
| <i>P. chabaudi adami</i> DS    | MLIIII LI ATGAI LASLLI FYFFKSNKP GDDYDKMGQADT YGKAQSRKDEMLDPEVSWGEGDKRASHTT PVLMEKPY               | 558 |

### Supplemental Figure 1: Sequence comparison of PccAS AMA1

The sequence of PccAS AMA1 was aligned (by Clustal W method) to that of related parasite *P. chabaudi adami* DS. The sequence differs by 34  $\alpha$  (shown in grey).

**A**

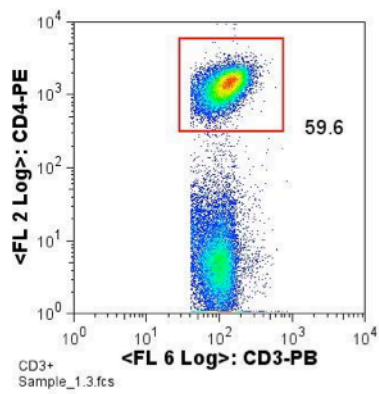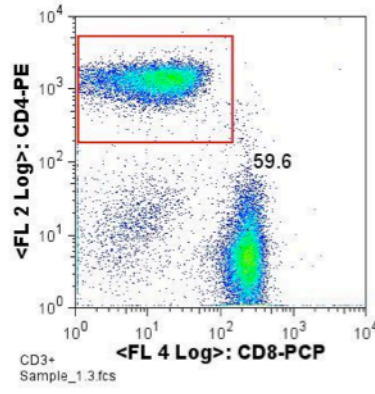

**B**

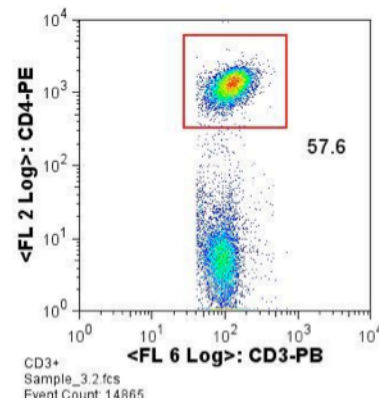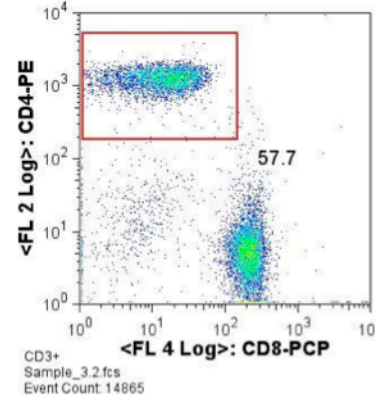

**C**

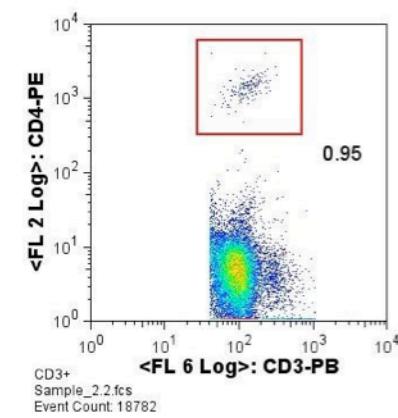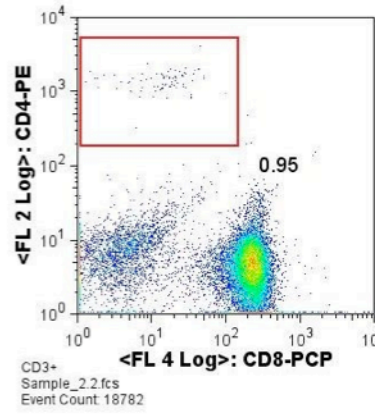

**D**

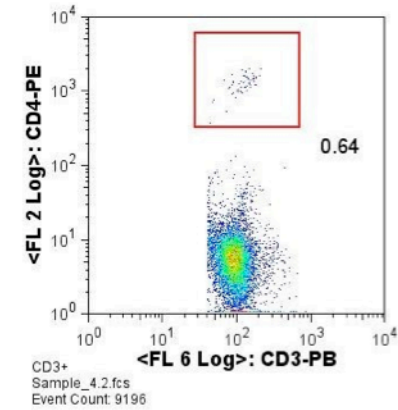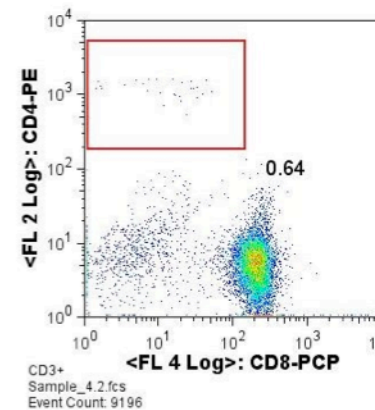

**Supplemental Figure 2: *In vivo* CD4<sup>+</sup> T cell depletion using anti-CD4 GK1.5 mAb.**

Two groups of BALB/c mice ( $n=6$ ) were immunised with  $5 \times 10^{10}$  vp AdHu5-PcAMA1 and boosted 8 weeks later with  $1 \times 10^7$  pfu MVA-PcAMA1. CD4<sup>+</sup> T cells were depleted in one group of naïve and one group of vaccinated mice with anti-CD4 GK1.5 mAb. The mice received 200µg of depleting anti-CD4 mAb intraperitoneally (i.p.) on days -2, -1 and day of challenge (day 0). Seven days after challenge the PMBCs were isolated from a blood sample and surface stained for CD3 (clone 145-2C11), CD4 (clone LT34) and CD8α (clone 53-6.7). Cells were analyzed by flow cytometry for % CD3<sup>+</sup> CD4<sup>+</sup> T cells (left panel) in the depleted and non-depleted samples, and the CD4<sup>+</sup> and CD8<sup>+</sup> T cells were plotted against each other (right panel). The figure shows representative flow plots for vaccinated non-depleted (A), naïve non-depleted (B), vaccinated depleted (C) and naïve depleted (D). There was still > 98% depletion at day 7 post challenge.

A

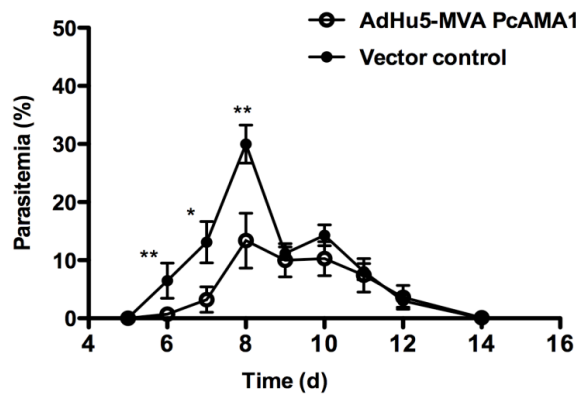

B

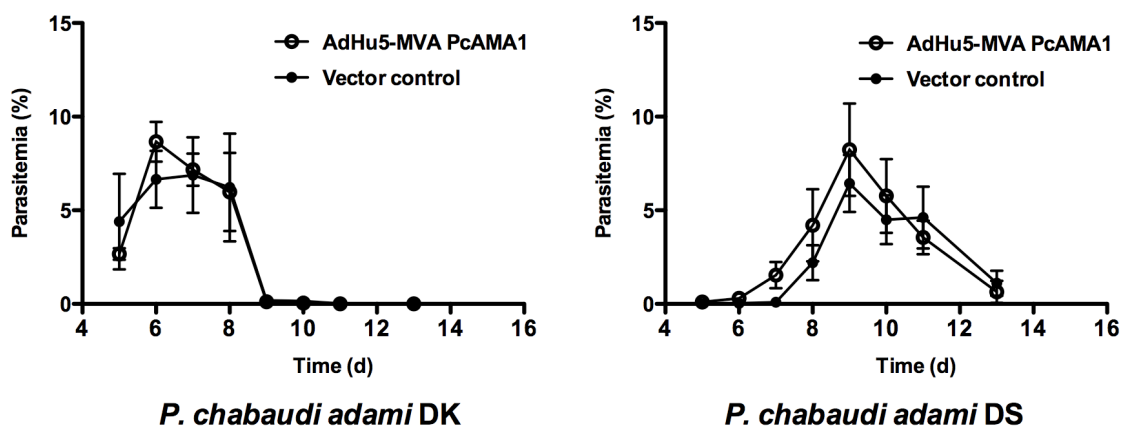

**Supplemental Figure 3: (A) Comparison of efficacy after immunization of BALB/c mice with control viral vaccines and those recombinant for PcAMA1 (B) Efficacy of the AdHu5-MVA PcAMA1 vaccination regime against challenge with heterologous parasite strains.**

Mice were primed with  $1 \times 10^{10}$  vp AdHu5-PcAMA1 or non-recombinant AdHu5 control and boosted 8 weeks later with  $1 \times 10^7$  pfu MVA-PcAMA1 or MVA expressing GFP. Two weeks after the boost mice were challenged i.v. with (A)  $10^5$  PccAS pRBC or (B) *P. chabaudi adami* DK or *P. chabaudi adami* DS). Parasitemia was monitored from day 5 by Giemsa-stained thin blood smears and results are expressed as the % infected RBCs (mean  $\pm$  SEM). The difference in parasitemia between the groups was taken as the measure of vaccine efficacy. As seen with naïve mice, there was a significant difference in parasitemia between the control and PcAMA1 immunized mice by Mann-Whitney test (\*  $P \leq 0.05$  and \*\*  $P \leq 0.01$ ) (A). There was no significant difference in parasitemia between the vector control and PcAMA1 immunized mice when challenged with heterologous *P. chabaudi* parasites (B).

| <b>POOL</b>    | <b>PEPTIDE #</b> | <b><math>\alpha\alpha</math> SEQUENCE</b> | <b><math>\alpha\alpha</math> POSITION</b> |
|----------------|------------------|-------------------------------------------|-------------------------------------------|
| <b>Pool 7</b>  | Pcc 1            | CSEGTDNIISENGDV                           | 21-35                                     |
|                | Pcc 2            | DNIISENGDVKFDLI                           | 26-40                                     |
|                | Pcc 3            | ENGDVKFDLIPKENT                           | 31-45                                     |
|                | Pcc 4            | KFDLIPKENTERSHK                           | 36-50                                     |
|                | Pcc 5            | PKENTERSHKLINPW                           | 41-55                                     |
|                | Pcc 6            | ERSHKLINPWEKFME                           | 46-60                                     |
|                | Pcc 17           | ITIQNSKVSFLTRVA                           | 101-115                                   |
|                | Pcc 18           | SKVSFLTRVATGNQK                           | 106-120                                   |
|                | Pcc 19           | LTRVATGNQKVREGG                           | 111-125                                   |
| <b>Pool 8</b>  | Pcc 20           | TGNQKVREGGLAFPQ                           | 116-130                                   |
|                | Pcc 21           | VREGGLAFPQTDVNI                           | 121-135                                   |
|                | Pcc 22           | LAFPQTDVNIAPITI                           | 126-141                                   |
|                | Pcc 23           | TDVNIAPITIANLKL                           | 131-145                                   |
|                | Pcc 24           | APITIANLKLMYKDH                           | 136-150                                   |
|                | Pcc 27           | KEILALNDMSLCAKH                           | 151-165                                   |
|                | Pcc 28           | LNDMSLCAKHASFYV                           | 156-170                                   |
|                | Pcc 31           | PGTNVNTAYRHPAVY                           | 171-185                                   |
|                | Pcc 32           | NTAYRHPAVYDKSNQ                           | 176-190                                   |
|                | Pcc 33           | HPAVYDKSNQACYIL                           | 181-195                                   |
|                | Pcc 34           | DKSNQACYILYVAAQ                           | 186-200                                   |
| <b>Pool 9</b>  | Pcc 35           | ACYILYVAAQENMGP                           | 191-205                                   |
|                | Pcc 36           | YVAAQENMGPARYCSN                          | 196-210                                   |
|                | Pcc 37           | ENMGPARYCSNEEDNE                          | 201-215                                   |
|                | Pcc 38           | RYCSNEEDNENQPFQ                           | 206-220                                   |
|                | Pcc 39           | EEDNENQPFQFTPEK                           | 211-225                                   |
|                | Pcc 40           | NQPFQFTPEKKDEYK                           | 216-230                                   |
|                | Pcc 41           | FTPEKKDEYKNLAYL                           | 221-235                                   |
|                | Pcc 42           | KDEYKNLAYLTKNLR                           | 226-240                                   |
|                | Pcc 43           | NLAYLTKNLRDREWET                          | 231-245                                   |
|                | Pcc 44           | TKNLRDREWETSCPNK                          | 236-250                                   |
| <b>Pool 10</b> | Pcc 45           | EDREWETSCPNKAIQNA                         | 241-255                                   |
|                | Pcc 46           | SCPNKAIQNAKFGVW                           | 246-260                                   |
|                | Pcc 47           | AIQNAKFGVWVDGYC                           | 251-265                                   |
|                | Pcc 48           | KFGVWVDGYCSEYQK                           | 256-270                                   |
|                | Pcc 49           | VDGYCSEYQKKEVRD                           | 261-275                                   |
|                | Pcc 50           | SEYQKKEVRDSENSLS                          | 266-280                                   |
|                | Pcc 51           | KEVRDSENSLSDCSKI                          | 271-285                                   |
|                | Pcc 52           | SNSLSDCSKIVFDES                           | 276-290                                   |
|                | Pcc 53           | DCSKIVFDESASDQP                           | 281-295                                   |
|                | Pcc 54           | VFDESASDQPKQYEK                           | 286-300                                   |
| <b>Pool 11</b> | Pcc 55           | ASDQPKQYEKHLEDT                           | 301-315                                   |
|                | Pcc 56           | KQYEKHLEDTAKIRR                           | 306-320                                   |
|                | Pcc 57           | HLEDTAKIRRGIVDR                           | 311-325                                   |
|                | Pcc 58           | AKIRRGIVDRNGKLI                           | 316-330                                   |
|                | Pcc 59           | GIVDRNGKLIGEALL                           | 321-335                                   |
|                | Pcc 60           | NGKLIGEALLPIGSY                           | 326-340                                   |
|                | Pcc 61           | GEALLPIGSYRADQV                           | 331-345                                   |
|                | Pcc 62           | PIGSYRADQVKSCKGK                          | 336-350                                   |
|                | Pcc 63           | RADQVKSCKGKGYNWA                          | 341-355                                   |
| Pcc 64         | KSKGKGYNWANYDKK  | 346-360                                   |                                           |
| <b>Pool 12</b> | Pcc 65           | GYNWANYDKKEKKCY                           | 351-365                                   |
|                | Pcc 66           | NYDKKEKKCYIFNKK                           | 356-370                                   |

|                |        |                 |         |
|----------------|--------|-----------------|---------|
|                | Pcc 67 | EKKCYIFNKKPTCLI | 361-375 |
|                | Pcc 68 | IFNKKPTCLINDKNF | 366-380 |
|                | Pcc 69 | PTCLINDKNFVATTA | 371-385 |
|                | Pcc 70 | NDKNFVATTALSSLE | 376-390 |
|                | Pcc 71 | VATTALSSLEEASQE | 381-395 |
|                | Pcc 72 | LSSLEEASQESFPCD | 386-400 |
|                | Pcc 73 | EASQESFPCDIYKKK | 401-415 |
|                | Pcc 76 | IAEEIKVMNVNRNNN | 406-420 |
| <b>Pool 13</b> | Pcc 77 | KVMNVNRNNNGNGTI | 401-415 |
|                | Pcc 78 | NRNNNGNGTIQFPRI | 406-420 |
|                | Pcc 81 | FISDDKESLKPCPEP | 421-435 |
|                | Pcc 82 | KESLKPCPEPTQLTQ | 426-440 |
|                | Pcc 83 | CPCEPTQLTQSSCNF | 431-445 |
|                | Pcc 84 | TQLTQSSCNFFVCNC | 436-450 |
|                | Pcc 87 | VEKRQFISENNEVEI | 451-465 |
|                | Pcc 88 | FISENNEVEIKEEFK | 456-470 |
|                | Pcc 89 | NEVEIKEEFKSEYES | 461-470 |
|                | Pcc 90 | KEEFKSEYESPINQ  | 466-480 |

**Supplemental Table 1: PccAS peptide pools P7 to P13 covering the entire ectodomain of PccAS AMA1.**

The table shows the seven peptide pools tested by ICS (Figure 3) and the  $\alpha$  sequence of each peptide. Each pool contains 10 peptides (each 15mers) and covers the remainder of the entire ectodomain of PccAS AMA1 (not covered by peptides shown in Table 1).
